# Supplementary material
Source: PubMed Central journal article supplement (PMC4291112)
Supplement: NIHMS590874-supplement-Supplemental_File.pdf [file NIHMS590874-supplement-Supplemental_File.pdf]

## SUPPLEMENTARY APPENDIX

### Table of Contents

|                                                                                                                                                                                   |    |
|-----------------------------------------------------------------------------------------------------------------------------------------------------------------------------------|----|
| <b>Appendix Methods</b> .....                                                                                                                                                     | 3  |
| <b>Appendix References</b> .....                                                                                                                                                  | 12 |
| <b>Supplemental Figure Legends</b> .....                                                                                                                                          | 13 |
| <b>Appendix Figure S1</b> A flowchart illustrating the cross validation process for selection<br>of the 53 gene panel.....                                                        | 14 |
| <b>Appendix Figure S2</b> A mean ROC curve of the cross validation of the 42 overlap genes<br>between the 53-gene panel and the 758-gene GEO module and its AUC distribution..... | 15 |
| <b>Appendix Table S1</b> Official names of all 446 genes selected for NanoString analysis<br>in training cohort.....                                                              | 16 |
| <b>Appendix Table S2</b> References used in gene selection for the 446 gene panel.....                                                                                            | 18 |
| <b>Appendix Table S3</b> Proposed functions for the 25 genes with the highest out-degree in the<br>53-gene panel Bayesian network .....                                           | 28 |
| <b>Appendix Table S4.</b> Top 10 enriched KEGG and GO terms (using DAVID) in the 53-gene,<br>446-gene, and 758-gene modules relative to the whole genome.....                     | 30 |
| <b>Appendix Table S5</b> Differences between the Training and Test Sets .....                                                                                                     | 31 |
| <b>Appendix Table S6</b> Gene expression data from primary melanoma tumors                                                                                                        |    |

GEO (GSE15605) .....32

**Appendix Table S7** Clinical characteristics of patients with primary melanoma in  
extracted vs. non-extracted samples .....34

**Data Set 1.** KEGG pathway and GO biological process and molecular function  
enrichment in the 758, 446, 53-gene modules relative to the whole genome, the 463-gene  
panel Bayesian network, and VisAnt Network-gene-pathway-enrichment. ....35

## **APPENDIX METHODS**

### **RNA Extraction**

FFPE tissue blocks were cut into four 20µm sections and treated with 100% xylene (Fisher Scientific, Pittsburgh, PA) to deparaffinize. Samples were washed twice with 100% ethanol (Absolute Ethanol Molecular Biology Grade 200 proof, Fisher Scientific, Pittsburgh, PA) and dried via vacuum centrifugation at 40°C. Tissue was then incubated in Digestion Buffer and Protease (Ambion® RecoverAll, Life Technologies, Carlsbad, CA) at 50°C for 3 hours, followed by a 15-minute incubation at 80°C. RNA was separated using an Isolation Additive/Ethanol mixture (Ambion® RecoverAll, Life Technologies, Carlsbad, CA), and filtered by centrifugation at 10,000rpm. The sample was rinsed with Wash 1 and Wash 2 (Ambion® RecoverAll, Life Technologies, Carlsbad, CA), before and after incubation with DNase for 30 minutes at RT. RNA was eluted with 60µl of Elution Solution (Ambion® RecoverAll, Life Technologies, Carlsbad, CA) at RT.

### **Dermatopathology**

Primary and recurrent melanomas were selected from the Tamtron PowerPath database at the Mount Sinai Medical Center (New York, NY), the Cerner CoPathPlus database at Geisinger Heath System (Danville, PA), and the Oracle Clinical RDC 4i database at NYU Medical Center (New York, NY). Selected slides and paraffin blocks were reviewed by two of the study authors (RGP and SS). Each sample was evaluated for histogenetic type, extent and type of inflammatory infiltrate, thickness, and ulceration.

High magnification images of H&E stained tumor specimens were evaluated for TILs and mitotic rate by a dermatopathologist. Tumor infiltrating lymphocytes (TILs) were defined as ones that percolated between and around tumor cells. (Rao *et al.*, 2010). Brisk refers to lymphocytes present throughout the substance or infiltrating the entire base of the vertical growth phase; non-brisk refers to lymphocytes in one focus or more of the vertical growth phase, either dispersed throughout or situated focally in the periphery; and absent if there were no lymphocytes or if they were present but did not infiltrate the melanoma.(Mandala *et al.*, 2009) TILS were scored as 0 for absent, 1 for nonbrisk and 2 for brisk. Mitotic rate was defined as the number of mitosis per mm<sup>2</sup> and scored 1-7 based on number of mitosis per mm<sup>2</sup> (<1, <2, <5, <10, <15, <20 or >20, adapted from the AJCC update published by Balch and colleagues.(Balch *et al.*, 2011)). Scoring for TILS and mitotic rate was used for subsequent cox and multivariable analysis.

## **NanoString**

### *Gene Expression Analysis*

446 candidate genes were selected based on a PubMed literature search using the reference terms: melanoma, biomarker, immune, and gene signature (See Table S2). The nCounter<sup>®</sup> platform (NanoString Technologies, Seattle, WA), was used to quantify relative gene expression in a multiplex reaction. A custom CodeSet, designated MtSinai0511, was synthesized by NanoString for the 446 selected genes as well as 17 housekeeping genes and 14 controls in a 477-plex reaction (listed in the supplemental reference file). Hybridizations were carried out according to the supplier protocols.<sup>3</sup> In a total reaction volume of 30µl, 100ng of each RNA sample in 5µl H<sub>2</sub>O was mixed with 10µl nCounter Reporter probes, 10µl

hybridization buffer (1x hybridization buffer = 5x SSPE, 0.1% Tween-20), and 5 $\mu$ l of nCounter Capture probes. Hybridizations were incubated at 65°C for approximately 16-20 hours. Following hybridization, the samples were processed in a PrepStation and counted in a DigitalAnalyzer (NanoString Technologies) according to standard protocol recommended by NanoString Technologies.

### *Normalization of Data*

Calculated from the sum counts of reporters of 6 positive control RNA spikes, sample-specific normalization factors were used to normalize raw mRNA counts in order to account for slight differences in assay efficiency such as hybridization, purification, and binding. Concentrations of the control RNA spikes range from 0.125-128fM. Normalization for sample RNA quantity and quality differences were applied to the spike-normalized values using sample-specific normalization factors calculated from the geometric mean of the counts from reporters targeting the housekeeping genes. Housekeeping genes were discarded if spike-normalized counts showed significant ( $p < 0.05$ ) difference between progressors and non-progressors. The resulting normalized counts were used in downstream analyses. For the validation set, the 53 genes were measured in two batches, with some common samples between them (technical replicates). In order to account for batch effect, the ratio of probe counts between each of the replicate samples tested in both codesets. Standard ratios were then calculated for each probe and then used to adjust the two data sets so they could be analyzed together.

## **Immunohistochemistry**

Five micron sections of the same paraffin-embedded tissue samples analyzed by NanoString were prepared for immunophenotypic analysis. Immunohistochemistry (IHC) was performed using primary, pre-diluted anti-CD2 (MRQ-11, mouse anti-human, Ventana Medical Systems, Tucson, AZ). Sections were deparaffinized, stained according to standard protocol using a Ventana BenchMark XT immunostainer and manually counterstained. (Ventana, 2010) The immunohistochemical slides were evaluated and interpreted by two of the study authors (SGB & MMM) in a blinded manner without knowledge of corresponding clinical data. For each sample, cells with circumferential membrane staining were counted and averaged in 8 random HPFs using an ocular micrometer with a  $1\text{mm}^2$  grid (Nikon Eclipse E400®).

## **Statistical Analysis**

### *Computation Method for Co-expression Network Analysis*

From the NIH GEO database, 46 samples of gene expression data identified based on origin in primary melanoma tissue and expression platform were collected. Let  $N$  denote the total number of genes in the whole-genome. For an overlap of  $m$  genes between a module of size  $M$  and a panel of genes of size  $n$ , an enrichment fold was computed using the ratio of the proportion of panel genes contained in the module ( $m/n$ ) to the proportion of whole genome genes contained in the module ( $M/N$ ). That is, enrichment fold =  $(m/n)/(M/N)$ . The p-value of this enrichment fold is calculated by using Fisher exact test.

### *Cross-validation*

Please see Figure S1 for schema. We simulated 900 iterations of a 11-fold cross-validation on the training dataset with random sample reordering in each iteration to strengthen the robustness of our final classifier model. Four samples were removed at random. These sample sets were then used as training data to fit a statistical model. 10,000 model training tasks were performed. The trained model and gene predictors selected were recorded in each task yielding 10,000 models and 10,000 lists of gene predictors based on randomly sub-sampled training samples. For each model, we performed a classification for the entire training (40 samples) and test datasets (48 samples). To derive a robust list of gene hits by these models, the 10,000 gene lists were pooled and the statistical count of each gene (out of 446 genes) was selected by these models using the training cohort only. A higher count value for a given gene indicates that it is frequently selected as a predictor during the cross-validation process. Finally, all genes selected at least once in the 10,000 cross-validation were put into a final model training task to yield an optimal, compact predictor gene list of 53 genes.

### *Ensemble classification/regression method*

We employed a two-step sequential ensemble classification scheme that sequentially concatenated two widely applied classifiers: random forest and elastic net. Random forest itself is an ensemble classifier consisting of many decision trees that generates the mode of individual classes yielded by independent trees. A powerful variable selector and classification/regression method, elastic net integrates a linear regression model with Lasso and Ridge regularization. Elastic net is particularly useful when there are many more

predictors than samples, serving to further exclude genes that are only correlated with, but not most predictive, of recurrence. We applied this two-step ensemble classification scheme to the cross-validated training data for the outer loop of the 900, 11-fold training cross-validation data points.

### *Random Forest*

With 446 genes as an initial set of features and 40 samples from the cross-validation used as training data, a random forest model was fit. Initially, random forest was run without feature selection to determine the importance of all 446 genes based on various metrics in the RandomForest R package.(A., 2002) Next, an independent run was started that incorporated feature selection into random forest by sequentially reducing a certain number of predictors, ranked by variable importance, by employing a nested cross-validation procedure. In our simulation, a leave-one-out strategy was used. In each internal cross-validation, we removed (step=30%) the least important genes/features, ranked by variable importance, from the last cross-validation iteration. Next, we drew (Ntree=50k) bootstrap samples from the original data (40 samples). For each of the bootstrap samples, we generated an untrimmed classification/regression tree with randomly selected (mtry=22) genes from the pool of genes leftover following removal. Following cross-validation, we selected the number of genes that resulted in the lowest error rate among all the cross-validation runs. This number represents the number of genes ( $N_{RF}$ ) selected by random forest after cross-validation. Next, we selected the top  $N_{RF}$  genes based on the averaged gene rank from the initial run without feature selection, yielding our final gene selections by random forest. The selected genes  $G_{RF}$  were used as input for an elastic net model in order to identify the constituents of a gene signature predictive of melanoma recurrence.



### *Elastic Net*

A powerful variable selector and classification/regression method, elastic net integrates a linear regression model with Lasso and Ridge regularization (Zou, 2005). Elastic net is particularly useful when there are many more predictors than samples, serving to further exclude genes that are only correlated with, but not most predictive of recurrence. In each round of 11-fold cross-validation on the training data, there were 40 training samples. The number of genes selected by random forest varied from 50 to 446 depending on both the leave-one-out training data and randomized feature selection used during decision tree growth. Elastic net extends the basic form of linear/logistic regression via L1 and L2-regularization.  $\lambda$  controls the model complexity with higher values resulting in a less complex model (less number of genes).  $\alpha$  controls the balance between two types of model complexity penalties, including the ridge-regression penalty ( $\alpha=0$ ) and the lasso penalty ( $\alpha=1$ ). The Ridge penalty is particularly useful when there are more genes and fewer samples. Ridge regression is known to shrink the coefficients of correlated predictors towards each other. In contrast, lasso tends to pick one out of an entire set and ignore the rest. In our study, we set  $\alpha=0.2$  and used an internal leave-one-out cross-validation to select an optimal value of  $\lambda$  (Friedman *et al.*, 2010). Our input training data was a subset of the original training data based on the gene lists  $G_{RF}$  determined by random forest. The output gene lists by elastic net with non-zero coefficients is our final gene list  $G_{EN}$  for the cross-validation run.

### **Network Analysis**

*Constructing the 53-gene and 446-gene induced networks in VisAnt*

To identify a biologically relevant neighborhood of genes surrounding the 53-gene panel, a physical gene interaction network was constructed using the knowledgebase network tool VisAnt 4.0. (Hu *et al.*, 2013; Hu *et al.*, 2004) A reference network was similarly constructed using the original 446-gene panel.

Filters were used to constrain the interactions to the following tissues/cells: epidermis, immune cells, immune cell lines, or melanoma cell lines. Furthermore, filters were used to constrain interactions to those that were observed in cancer, immunological diseases, or without any disease association. Each VisAnt network (53-gene panel network and 446-gene panel network) was obtained in the following two steps. After uploading a gene panel into VisAnt, a search was made for all first neighbor interactions within the gene panel or between a panel gene and a new gene. All interactions were obtained from the Predictome. (Mellor *et al.*, 2002) database that is now housed within VisAnt. Any interaction that was based on prediction/inference (Dataset S5) was removed. To reduce the possible number of false positive interactions, interactions that were supported by one reference/evidence were also removed. Second, with the new list of genes induced by the gene panel, an internal query for interactions among new first neighbor genes was also made. Therefore, the resulting induced networks represented all possible interactions among panel genes and their first neighbors. The gene lists from each of these networks were then used to construct Bayesian networks using the melanoma gene expression dataset (GSE15605).

*Constructing the 53-gene and 446-gene Bayesian Networks*

As the interactions in VisAnt were only weakly related to Melanoma, the *interactions* modeling the specific immune response to melanoma were identified via a Bayesian network (BN) on the VisAnt node list using the same melanoma gene expression dataset as the co-expression analysis (GSE15605). If a panel gene or a gene identified in VisAnt was not in the gene expression data set, it was dropped from the Bayesian network. A reference Bayesian network was similarly constructed for the 446-gene panel and its neighborhood set. For the Bayesian network inference, a Markov Chain Monte Carlo Markov Chain (MCMC) method was used for sampling from the posterior distribution of network structures. As an input data for the Bayesian network inference, each variable (gene expression) is discretized into three groups by equal quantiles. On a high-performance computing facility, the gene set of g53 was run for MCMC of 30 chains from an empty network for 48 hours and the gene set of g463 was run for MCMC of 97 chains from an empty network for 120 hours. During 48 hours, the MCMC chains for g53 gene list were run for  $7 \times 10^7$  iterations on average and every 5000 iteration was taken as posterior samples of networks after removing the first  $5 \times 10^7$  iterations for burn-ins. The posterior samples from each chain were aggregated into one set of posterior samples. For g463 gene list, during 120 hours, the MCMC chains were run for  $7.5 \times 10^6$  iterations on average and every 5000 iteration was taken as posterior samples of networks after removing the first  $5 \times 10^7$  iterations for burn-ins. The posterior samples of 97 chains were aggregated into one set of posterior samples. A Bayesian model selection was conducted on the posterior samples of Bayesian network structures. The posterior probability of the presence of each directed edge is calculated and the edges of top 1% posterior probability were selected to be included in the final network structure. These two network structures (g53 and g463) were drawn with

Cytoscape. The graphs were laid out by spring-embedded algorithm. Edge transparencies were in proportion to the posterior probability and node sizes were in proportion to the out-degree of the node.

## LEGEND FOR SUPPLEMENTAL FIGURES

**Figure S1.** A flowchart illustrates the cross validation process on the training set to strengthen the robustness of our model. Dashed box shows the ensemble classification algorithm for gene selection. Data bootstrap is performed by resampling the data samples with replacement ( $n=10,000$ ). The final gene panel is a combination of gene lists.

**Figure S2.** Mean ROC curves with cross-validation and distributions of AUC values of the 42 genes in the 53-gene panel for the training set (**a**) and the test set (**b**) are shown. Training: mean AUC=0.910,  $p<0.001$ . Test: mean AUC=0.744,  $p<0.001$ . In (**c**), distribution of AUC values using a leave-8-out cross-validation with bootstrapping test is shown.

## APPENDIX METHODS REFERENCES

A. L (2002) Classification and Regression by Random Forrest. *R News* 2:18-22.

Balch CM, Gershenwald JE, Soong SJ, Thompson JF (2011) Update on the melanoma staging system: the importance of sentinel node staging and primary tumor mitotic rate. *J Surg Oncol* 104:379-85.

Friedman J, Hastie T, Tibshirani R (2010) Regularization Paths for Generalized Linear Models via Coordinate Descent. *Journal of statistical software* 33:1-22.

Hu Z, Chang YC, Wang Y, Huang CL, Liu Y, Tian F, *et al.* (2013) VisANT 4.0: Integrative network platform to connect genes, drugs, diseases and therapies. *Nucleic acids research* 41:W225-31.

Hu Z, Mellor J, Wu J, DeLisi C (2004) VisANT: an online visualization and analysis tool for biological interaction data. *BMC bioinformatics* 5:17.

Mellor JC, Yanai I, Clodfelter KH, Mintseris J, DeLisi C (2002) Predictome: a database of putative functional links between proteins. *Nucleic acids research* 30:306-9.

Rao UN, Lee SJ, Luo W, Mihm MC, Jr., Kirkwood JM (2010) Presence of tumor-infiltrating lymphocytes and a dominant nodule within primary melanoma are prognostic factors for relapse-free survival of patients with thick (t4) primary melanoma: pathologic analysis of the e1690 and e1694 intergroup trials. *American journal of clinical pathology* 133:646-53.

Zou H (2005) Regularization and variable selection via the elastic net. *Journal of the Royal Statistical Society Series B*:301-21.

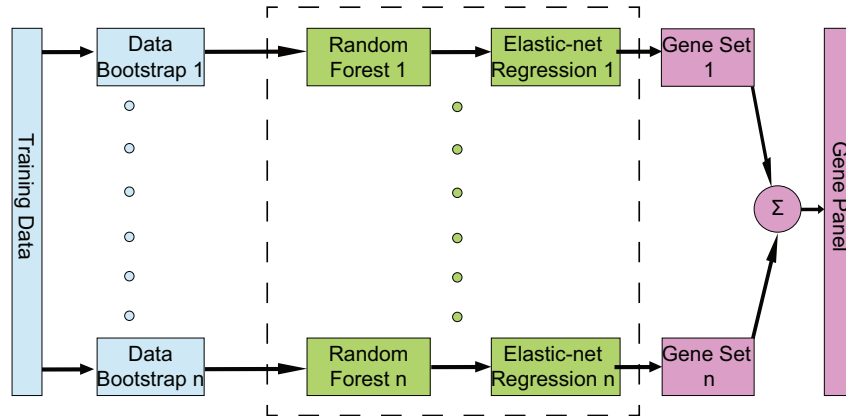

**Figure S1** A flowchart illustrating the cross validation process for selection of the 53 gene panel.

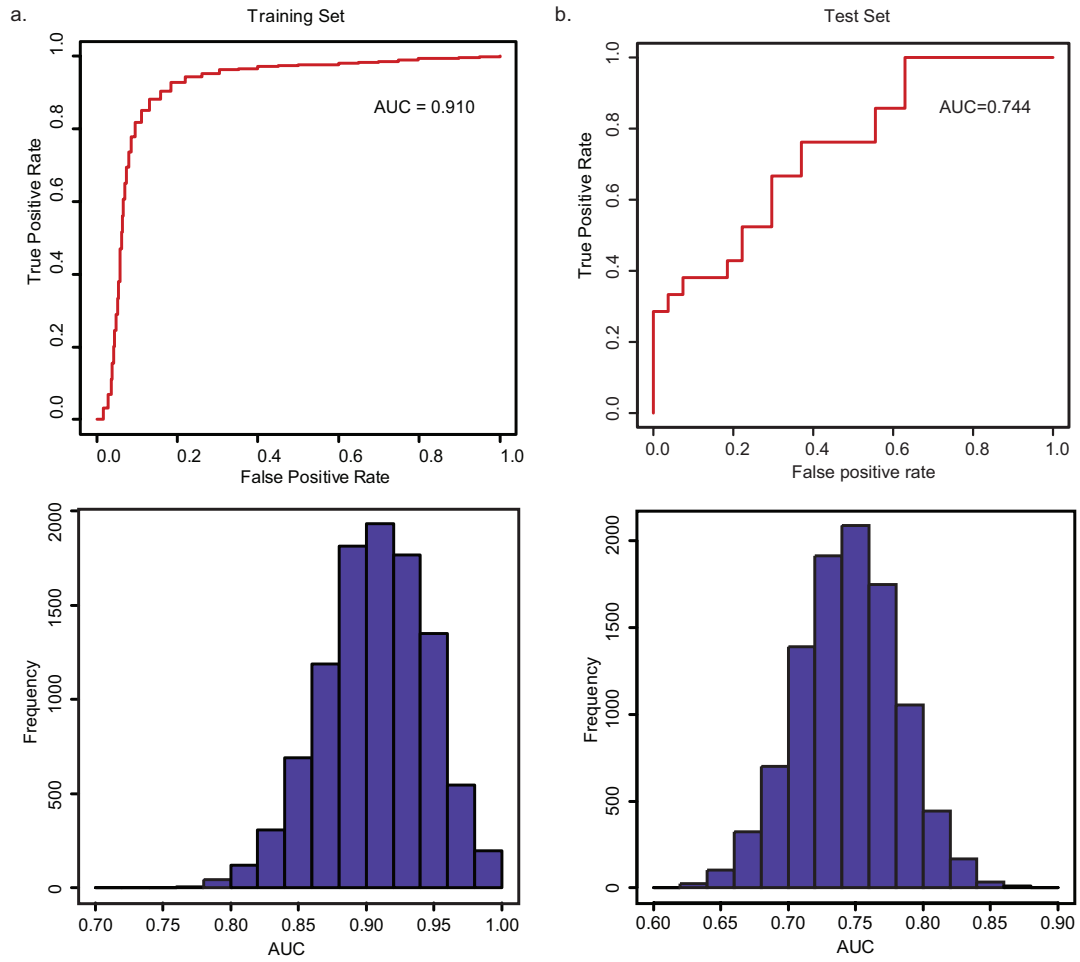

**Figure S2** A mean ROC curve of the cross validation of the 42 overlap genes between the 53-gene panel and the 758-gene GEO module and its AUC distribution

**Table S1.** Official names of all 446 genes selected for NanoString analysis in Training Set.

|         |        |         |         |          |        |         |          |        |
|---------|--------|---------|---------|----------|--------|---------|----------|--------|
| A2M     | CCL24  | CD207   | CMKLR1  | ENG      | HLAE   | IGHG2   | IL1RAPL2 | IRF7   |
| ALCAM   | CCL25  | CD209   | COLEC12 | F13A1    | HLAF   | IGHG3   | IL1RL1   | IRF8   |
| ALOX5   | CCL26  | CD24    | CREB1   | FAS      | HLAG   | IGHG4   | IL1RL2   | IRF9   |
| AMICA1  | CCL27  | CD27    | CRP     | FCAMR    | HMGB1  | IGHM    | IL1RN    | ISG15  |
| ANGPTL4 | CCL28  | CD36    | CSF1    | FCER1A   | ICAM1  | IGKC    | IL2      | ISG20  |
| ANXA1   | CCL3   | CD37    | CSF1R   | FCER2    | ICOS   | IGLL1   | IL21     | ITGA1  |
| ANXA11  | CCL3L1 | CD38    | CSF2    | FCGR1A   | ICOSLG | IGSF4   | IL22RA1  | ITGA2  |
| B2M     | CCL4   | CD3E    | CSF2RA  | FCGR2A   | IFI27  | IGSF9   | IL23A    | ITGA4  |
| BCL10   | CCL5   | CD4     | CSF2RB  | FCGR3A   | IFI35  | IKBKG   | IL23R    | ITGA5  |
| BCL2A1  | CCL7   | CD40    | CSF3    | FCGR3B   | IFI44  | IKZF1   | IL24     | ITGA6  |
| BCL3    | CCL8   | CD40LG  | CSF3R   | FCGRT    | IFI6   | IKZF5   | IL25     | ITGA9  |
| BCL6    | CCR1   | CD47    | CTLA4   | FLT3     | IFIH1  | IL10    | IL27     | ITGAL  |
| BDCA3   | CCR10  | CD48    | CTSS    | FN1      | IFIT1  | IL10RA  | IL28A    | ITGAM  |
| BIK     | CCR2   | CD5     | CX3CL1  | Foxp3    | IFIT2  | IL11    | IL28RA   | ITGB1  |
| BIRC5   | CCR3   | CD53    | CX3CR1  | FPR1     | IFITM1 | IL12A   | IL2R     | ITGB2  |
| CXCR5   | CCR4   | CD55    | CXCL1   | FYN      | IFITM2 | IL12B   | IL33     | ITGB3  |
| BTK     | CCR5   | CD58    | CXCL10  | GATA3    | IFNA1  | IL12RB1 | IL34     | ITGB4  |
| C1QA    | CCR6   | CD63    | CXCL11  | GBP1     | IFNA14 | IL12RB2 | IL37     | ITK    |
| C3      | CCR7   | CD68    | CXCL12  | GBP2     | IFNA2  | IL13    | IL3RA    | JAK1   |
| C3AR1   | CCR8   | CD70    | CXCL13  | GHR      | IFNA21 | IL13RA1 | IL4      | KCNIP2 |
| CASP1   | CCR9   | CD74    | CXCL14  | GPR44    | IFNA4  | IL13RA2 | IL4R     | KLF6   |
| CCBP2   | CCRL1  | CD79A   | CXCL16  | GZMK     | IFNA5  | IL15    | IL5      | KLRD1  |
| CCL1    | CCRL2  | CD79B   | CXCL2   | HIF1A    | IFNA6  | IL15RA  | IL6      | KLRK1  |
| CCL11   | CD101  | CD80    | CXCL3   | HLAA     | IFNA8  | IL17D   | IL6R     | LAMP1  |
| CCL13   | CD14   | CD83    | CXCL5   | HLAB     | IFNAR1 | IL17F   | IL7      | LAMP2  |
| CCL14   | CD163  | CD86    | CXCL6   | HLAC     | IFNAR2 | IL17RA  | IL8      | LAMP3  |
| CCL15   | CD164  | CD8A    | CXCL7   | HLA-DMA  | IFNE1  | IL17RB  | CXCR2    | LAT2   |
| CCL16   | CD180  | CDC42   | CXCL9   | HLA-DOB  | IFNG   | IL18    | INHBA    | LAX1   |
| CCL17   | CD19   | CEACAM1 | CXCR3   | HLA-DPA1 | IFNGR1 | IL18RAP | IRAK1    | LCK    |
| CCL18   | CD1A   | CEBPA   | CXCR4   | HLA-DPB1 | IFNGR2 | IL19    | IRAK2    | LEPR   |
| CCL19   | CD1B   | CHST4   | CXCR6   | HLA DQA1 | IFNK   | IL1A    | IRF1     | LGMN   |
| CCL2    | CD1C   | CISH3   | CYBB    | HLA-DQA2 | IFRG28 | IL1B    | IRF2     | LRP1   |
| CCL20   | CD1D   | CKLF    | CYFIP2  | HLA-DQB1 | IGCL2  | IL1F10  | IRF3     | LSP1   |
| CCL21   | CD2    | CLEC2A  | DUSP1   | HLA-DRB1 | IGF1R  | IL1R1   | IRF4     | LTA    |
| CCL22   | CD20   | CLEC4C  | DUSP5   | HLA-DRB3 | IGHA1  | IL1R2   | IRF5     | LTB    |
| CCL23   | CD200  | CLECL1  | EHD1    | HLA-DRB4 | IGHG1  | IL1RAP  | IRF6     | LTBR   |



|        |        |       |          |        |         |           |          |       |
|--------|--------|-------|----------|--------|---------|-----------|----------|-------|
| LY9    | MMP9   | NLRC5 | REL      | STAT1  | TIRAP   | TNFAIP3   | TNFRSF25 | TRAF2 |
| LY96   | MRC1   | NOS2A | RELA     | STAT2  | TLR1    | TNFAIP6   | TNFRSF4  | TRAF3 |
| LYVE1  | MSR1   | OAS1  | RELB     | STAT3  | TLR10   | TNFRSF10B | TNFRSF8  | TRAF6 |
| MAL2   | MST1R  | OPTN  | RIPK2    | SYK    | TLR2    | TNFRSF11A | TNFRSF9  | TRAT1 |
| MALT1  | MX1    | OSM   | Runx1    | TAP1   | TLR3    | TNFRSF11B | TNFSF10  | TSLP  |
| MAP3K7 | MYADM  | PDCD1 | S100A12  | TAP2   | TLR4    | TNFRSF12A | TNFSF11  | TXK   |
| MAPK1  | MYD88  | PDL1  | SAA1     | TARP   | TLR5    | TNFRSF13B | TNFSF12  | VCAM1 |
| MCAM   | NFAM1  | PILRA | SERPINB2 | TBX21  | TLR6    | TNFRSF13C | TNFSF13  | VEGFC |
| MDK    | NFATC3 | PILRB | SIGIRR   | TCL1A  | TLR7    | TNFRSF14  | TNFSF13B | XCL1  |
| MERTK  | NFKB1  | PLCG2 | SIGLEC1  | THBS1  | TLR8    | TNFRSF17  | TNFSF14  | XCL2  |
| MFGE8  | NFKB2  | PPARG | SKAP1    | TIA1   | TLR9    | TNFRSF18  | TNFSF18  | XCR1  |
| MGLL   | NFKBIA | PRG1  | SOCS1    | TICAM1 | TNF     | TNFRSF19L | TNFSF4   | ZAP70 |
| MIF    | NFKBIZ | PTGS2 | SP110    | TICAM2 | TNFAIP3 | TNFRSF1A  | TNFSF9   |       |
| MITF   | NLRC3  | PTPRC | SPP1     | TIMP3  | TNFAIP6 | TNFRSF21  | TRAF1    |       |

**Table S2.** Supplemental references used for gene selection and annotation.

- Airoidi I, Di Carlo E, Cocco C, et al. (2007) Endogenous IL-12 triggers an antiangiogenic program in melanoma cells. *Proceedings of the National Academy of Sciences of the United States of America* 104:3996-4001.
- Akazawa T, Masuda H, Saeki Y, et al. (2004) Adjuvant-mediated tumor regression and tumor-specific cytotoxic response are impaired in MyD88-deficient mice. *Cancer research* 64:757-64.
- Amersi FF, Terando AM, Goto Y, et al. (2008) Activation of CCR9/CCL25 in cutaneous melanoma mediates preferential metastasis to the small intestine. *Clinical cancer research : an official journal of the American Association for Cancer Research* 14:638-45.
- Andreani V, Gatti G, Simonella L, et al. (2007) Activation of Toll-like receptor 4 on tumor cells in vitro inhibits subsequent tumor growth in vivo. *Cancer research* 67:10519-27.
- Anichini A, Scarito A, Molla A, et al. (2003) Differentiation of CD8+ T cells from tumor-invaded and tumor-free lymph nodes of melanoma patients: role of common gamma-chain cytokines. *Journal of immunology* 171:2134-41.
- Arico E, Castiello L, Urbani F, et al. (2011) Concomitant detection of IFNalpha signature and activated monocyte/dendritic cell precursors in the peripheral blood of IFNalpha-treated subjects at early times after repeated local cytokine treatments. *Journal of translational medicine* 9:67.
- Asano K, Nabeyama A, Miyake Y, et al. (2011) CD169-positive macrophages dominate antitumor immunity by crosspresenting dead cell-associated antigens. *Immunity* 34:85-95.
- Augustine CK, Jung SH, Sohn I, et al. (2010) Gene expression signatures as a guide to treatment strategies for in-transit metastatic melanoma. *Molecular cancer therapeutics* 9:779-90.
- Batliwalla FM, Li W, Ritchlin CT, et al. (2005) Microarray analyses of peripheral blood cells identifies unique gene expression signature in psoriatic arthritis. *Molecular medicine* 11:21-9.
- Below JE, Gamazon ER, Morrison JV, et al. (2011) Genome-wide association and meta-analysis in populations from Starr County, Texas, and Mexico City identify type 2 diabetes susceptibility loci and enrichment for expression quantitative trait loci in top signals. *Diabetologia* 54:2047-55.
- Bieche I, Chavey C, Andrieu C, et al. (2007) CXC chemokines located in the 4q21 region are up-regulated in breast cancer. *Endocrine-related cancer* 14:1039-52.
- Bogunovic D, O'Neill DW, Belitskaya-Levy I, et al. (2009) Immune profile and mitotic index of metastatic melanoma lesions enhance clinical staging in predicting patient survival. *Proceedings of the National Academy of Sciences of the United States of America* 106:20429-34.
- Bozdogan N, Bozdogan O, Pak I, et al. (2010) FAS, FAS ligand, tumor infiltrating lymphocytes, and macrophages in malignant melanoma: an immunohistochemical study. *International journal of dermatology* 49:761-7.
- Briggs JJ, Haugen MH, Johansen HT, et al. (2010) Cystatin E/M suppresses legumain activity and invasion of human melanoma. *BMC cancer* 10:17.
- Bronkhorst IH, Ly LV, Jordanova ES, et al. (2011) Detection of M2-macrophages in uveal melanoma and relation with survival. *Investigative ophthalmology & visual science* 52:643-50.
- Bu H, Rosdahl I, Sun XF, et al. (2007) Importance of polymorphisms in NF-kappaB1 and NF-kappaB1alpha genes for melanoma risk, clinicopathological features and tumor progression in Swedish melanoma patients. *Journal of cancer research and clinical oncology* 133:859-66.
- Budhu A, Forgues M, Ye QH, et al. (2006) Prediction of venous metastases, recurrence, and prognosis in hepatocellular carcinoma based on a unique immune response signature of the liver microenvironment. *Cancer cell* 10:99-111.
- Calmels B, Paul S, Futin N, et al. (2005) Bypassing tumor-associated immune suppression with recombinant adenovirus constructs expressing membrane bound or secreted GITR-L. *Cancer gene therapy* 12:198-205.
- Catenacci DV, Cervantes G, Yala S, et al. (2011) RON (MST1R) is a novel prognostic marker and therapeutic target for gastroesophageal adenocarcinoma. *Cancer biology & therapy* 12:9-46.
- Charles J, Di Domizio J, Salameire D, et al. (2010) Characterization of circulating dendritic cells in melanoma: role of CCR6 in plasmacytoid dendritic cell recruitment to the tumor. *The Journal of investigative dermatology* 130:1646-56.
- Chen M, Pych E, Corpron C, et al. (2002) Regulation of CD36 expression in human melanoma cells. *Advances in experimental medicine and biology* 507:337-42.
- Cheng X, Hung MC (2009) Regulation of breast cancer metastasis by atypical chemokine receptors. *Clinical cancer research : an official journal of the American Association for Cancer Research* 15:2951-3.
- Cheung NK, Sowers R, Vickers AJ, et al. (2006) FCGR2A polymorphism is correlated with clinical outcome after immunotherapy of neuroblastoma with anti-GD2 antibody and granulocyte macrophage colony-stimulating factor. *Journal of clinical oncology : official journal of the American Society of Clinical Oncology* 24:2885-90.
- Chopra A, Kim TS, I OS, et al. (2006) Combined therapy of an established, highly aggressive breast cancer in mice with paclitaxel and a unique DNA-based cell vaccine. *International journal of cancer Journal international du cancer* 118:2888-98.

- 
- Conway C, Mitra A, Jewell R, et al. (2009) Gene expression profiling of paraffin-embedded primary melanoma using the DASL assay identifies increased osteopontin expression as predictive of reduced relapse-free survival. *Clinical cancer research : an official journal of the American Association for Cancer Research* 15:6939-46.
- Cornforth AN, Lee GJ, Fowler AW, et al. (2009) Increases in serum TARC/CCL17 levels are associated with progression-free survival in advanced melanoma patients in response to dendritic cell-based immunotherapy. *Journal of clinical immunology* 29:657-64.
- Critchley-Thorne RJ, Yan N, Nacu S, et al. (2007) Down-regulation of the interferon signaling pathway in T lymphocytes from patients with metastatic melanoma. *PLoS medicine* 4:e176.
- Cull VS, Tilbrook PA, Bartlett EJ, et al. (2003) Type I interferon differential therapy for erythroleukemia: specificity of STAT activation. *Blood* 101:2727-35.
- Cullen R, Germanov E, Shimaoka T, et al. (2009) Enhanced tumor metastasis in response to blockade of the chemokine receptor CXCR6 is overcome by NKT cell activation. *Journal of immunology* 183:5807-15.
- Cunningham S, Graham C, Hutchinson M, et al. (2005) Pharmacogenomics of responsiveness to interferon IFN-beta treatment in multiple sclerosis: a genetic screen of 100 type I interferon-inducible genes. *Clinical pharmacology and therapeutics* 78:635-46.
- Davis ID, Chen Q, Morris L, et al. (2006) Blood dendritic cells generated with Flt3 ligand and CD40 ligand prime CD8+ T cells efficiently in cancer patients. *Journal of immunotherapy* 29:499-511.
- de Haas M, Kerst JM, van der Schoot CE, et al. (1994) Granulocyte colony-stimulating factor administration to healthy volunteers: analysis of the immediate activating effects on circulating neutrophils. *Blood* 84:3885-94.
- De Palma M, Mazziere R, Politi LS, et al. (2008) Tumor-targeted interferon-alpha delivery by Tie2-expressing monocytes inhibits tumor growth and metastasis. *Cancer cell* 14:299-311.
- Del Pozo JL (2010) Primers on molecular pathways: lipopolysaccharide signaling - potential role in pancreatitis and pancreatic cancer. *Pancreatology : official journal of the International Association of Pancreatology* 10:114-8.
- Dengel LT, Norrod AG, Gregory BL, et al. (2010) Interferons induce CXCR3-cognate chemokine production by human metastatic melanoma. *Journal of immunotherapy* 33:965-74.
- Desai KV, Michalowska AM, Kondaiah P, et al. (2004) Gene expression profiling identifies a unique androgen-mediated inflammatory/immune signature and a PTEN (phosphatase and tensin homolog deleted on chromosome 10)-mediated apoptotic response specific to the rat ventral prostate. *Molecular endocrinology* 18:2895-907.
- Di Carlo E, D'Antuono T, Pompa P, et al. (2009) The lack of epithelial interleukin-7 and BAFF/BLyS gene expression in prostate cancer as a possible mechanism of tumor escape from immunosurveillance. *Clinical cancer research : an official journal of the American Association for Cancer Research* 15:2979-87.
- Diveu C, Venereau E, Froger J, et al. (2006) Molecular and functional characterization of a soluble form of oncostatin M/interleukin-31 shared receptor. *The Journal of biological chemistry* 281:36673-82.
- Doll D, Keller L, Maak M, et al. (2010) Differential expression of the chemokines GRO-2, GRO-3, and interleukin-8 in colon cancer and their impact on metastatic disease and survival. *International journal of colorectal disease* 25:573-81.
- Dror R, Lederman M, Umezawa K, et al. (2010) Characterizing the involvement of the nuclear factor-kappa B (NF kappa B) transcription factor in uveal melanoma. *Investigative ophthalmology & visual science* 51:1811-6.
- Du Q, Zhang X, Cardinal J, et al. (2009) Wnt/beta-catenin signaling regulates cytokine-induced human inducible nitric oxide synthase expression by inhibiting nuclear factor-kappaB activation in cancer cells. *Cancer research* 69:3764-71.
- Dudley ME, Yang JC, Sherry R, et al. (2008) Adoptive cell therapy for patients with metastatic melanoma: evaluation of intensive myeloablative chemoradiation preparative regimens. *Journal of clinical oncology : official journal of the American Society of Clinical Oncology* 26:5233-9.
- Ebert LM, Meuter S, Moser B (2006) Homing and function of human skin gamma delta T cells and NK cells: relevance for tumor surveillance. *Journal of immunology* 176:4331-6.
- Ellerhorst JA, Ekmekcioglu S, Johnson MK, et al. (2006) Regulation of iNOS by the p44/42 mitogen-activated protein kinase pathway in human melanoma. *Oncogene* 25:3956-62.
- Elmaagacli AH, Steckel N, Ditschkowski M, et al. (2011) Toll-like receptor 9, NOD2 and IL23R gene polymorphisms influenced outcome in AML patients transplanted from HLA-identical sibling donors. *Bone marrow transplantation* 46:702-8.
- Epardaud M, Elpek KG, Rubinstein MP, et al. (2008) Interleukin-15/interleukin-15R alpha complexes promote destruction of established tumors by reviving tumor-resident CD8+ T cells. *Cancer research* 68:2972-83.
- Etcheverry A, Aubry M, de Tayrac M, et al. (2010) DNA methylation in glioblastoma: impact on gene expression and clinical outcome. *BMC genomics* 11:701.
- Fourcade J, Sun Z, Benallaoua M, et al. (2010) Upregulation of Tim-3 and PD-1 expression is associated with tumor antigen-specific CD8+ T cell dysfunction in melanoma patients. *The Journal of experimental medicine* 207:2175-86.
-

---

Freudenberg J, Lee AT, Siminovitch KA, et al. (2010) Locus category based analysis of a large genome-wide association study of rheumatoid arthritis. *Human molecular genetics* 19:3863-72.

Friboulet L, Gourzoues C, Tsao SW, et al. (2010) Poly(I:C) induces intense expression of c-IAP2 and cooperates with an IAP inhibitor in induction of apoptosis in cancer cells. *BMC cancer* 10:327.

Friebe A, Schwarz MJ, Schmid-Wendtner M, et al. (2007) Pretreatment levels of sTNF-R1 and sIL-6R are associated with a higher vulnerability for IFN-alpha-induced depressive symptoms in patients with malignant melanoma. *Journal of immunotherapy* 30:333-7.

Fujita M, Scheurer ME, Decker SA, et al. (2010) Role of type 1 IFNs in antiglioma immunosurveillance--using mouse studies to guide examination of novel prognostic markers in humans. *Clinical cancer research : an official journal of the American Association for Cancer Research* 16:3409-19.

Gabrovska PN, Smith RA, Tiang T, et al. (2011) Semaphorin-plexin signalling genes associated with human breast tumourigenesis. *Gene* 489:63-9.

Galaup A, Cazes A, Le Jan S, et al. (2006) Angiopoietin-like 4 prevents metastasis through inhibition of vascular permeability and tumor cell motility and invasiveness. *Proceedings of the National Academy of Sciences of the United States of America* 103:18721-6.

Gallagher PG, Bao Y, Prorock A, et al. (2005) Gene expression profiling reveals cross-talk between melanoma and fibroblasts: implications for host-tumor interactions in metastasis. *Cancer research* 65:4134-46.

Galligan CL, Matsuyama W, Matsukawa A, et al. (2004) Up-regulated expression and activation of the orphan chemokine receptor, CCRL2, in rheumatoid arthritis. *Arthritis and rheumatism* 50:1806-14.

Gao K, Zhou H, Zhang L, et al. (2009) Systemic disease-induced salivary biomarker profiles in mouse models of melanoma and non-small cell lung cancer. *PloS one* 4:e5875.

Garmy-Susini B, Avraamides CJ, Schmid MC, et al. (2010) Integrin alpha4beta1 signaling is required for lymphangiogenesis and tumor metastasis. *Cancer research* 70:3042-51.

Genetic Analysis of Psoriasis C, the Wellcome Trust Case Control C, Strange A, et al. (2010) A genome-wide association study identifies new psoriasis susceptibility loci and an interaction between HLA-C and ERAP1. *Nature genetics* 42:985-90.

Gerlini G, Di Gennaro P, Mariotti G, et al. (2010) Indoleamine 2,3-dioxygenase+ cells correspond to the BDCA2+ plasmacytoid dendritic cells in human melanoma sentinel nodes. *The Journal of investigative dermatology* 130:898-901.

Giatromanolaki A, Sivridis E, Kouskoukis C, et al. (2003) Hypoxia-inducible factors 1alpha and 2alpha are related to vascular endothelial growth factor expression and a poorer prognosis in nodular malignant melanomas of the skin. *Melanoma research* 13:493-501.

Givant-Horwitz V, Davidson B, Reich R (2004) Laminin-induced signaling in tumor cells: the role of the M(r) 67,000 laminin receptor. *Cancer research* 64:3572-9.

Golovleva I, Kandefér-Szerszen M, Beckman L, et al. (1996) Polymorphism in the interferon-alpha gene family. *American journal of human genetics* 59:570-8.

Guiducci C, Vicari AP, Sangaletti S, et al. (2005) Redirecting in vivo elicited tumor infiltrating macrophages and dendritic cells towards tumor rejection. *Cancer research* 65:3437-46.

Gur-Dedeoglu B, Konu O, Bozkurt B, et al. (2009) Identification of endogenous reference genes for qRT-PCR analysis in normal matched breast tumor tissues. *Oncology research* 17:353-65.

Gutierrez-Roelens I, Lauwerys BR (2008) Genetic susceptibility to autoimmune disorders: clues from gene association and gene expression studies. *Current molecular medicine* 8:551-61.

Han SI, Lee SM, Joo YD, et al. (2011) Lateral dielectrophoretic microseparators to measure the size distribution of blood cells. *Lab on a chip* 11:3864-72.

Hardy MP, Owczarek CM, Jermini LS, et al. (2004) Characterization of the type I interferon locus and identification of novel genes. *Genomics* 84:331-45.

Harley IT, Niewold TB, Stormont RM, et al. (2010) The role of genetic variation near interferon-kappa in systemic lupus erythematosus. *Journal of biomedicine & biotechnology* 2010.

Harlin H, Meng Y, Peterson AC, et al. (2009) Chemokine expression in melanoma metastases associated with CD8+ T-cell recruitment. *Cancer research* 69:3077-85.

Harvey RC, Mullighan CG, Wang X, et al. (2010) Identification of novel cluster groups in pediatric high-risk B-precursor acute lymphoblastic leukemia with gene expression profiling: correlation with genome-wide DNA copy number alterations, clinical characteristics, and outcome. *Blood* 116:4874-84.

Hashimoto M, Ayada T, Kinjyo I, et al. (2009) Silencing of SOCS1 in macrophages suppresses tumor development by enhancing antitumor inflammation. *Cancer science* 100:730-6.

Hehlgans T, Pfeffer K (2005) The intriguing biology of the tumour necrosis factor/tumour necrosis factor receptor superfamily: players, rules and the games. *Immunology* 115:1-20.

---

- 
- Heindl LM, Hofmann-Rummelt C, Adler W, et al. (2011) Prognostic significance of tumor-associated lymphangiogenesis in malignant melanomas of the conjunctiva. *Ophthalmology* 118:2351-60.
- Hernandez-Chacon JA, Li Y, Wu RC, et al. (2011) Costimulation through the CD137/4-1BB pathway protects human melanoma tumor-infiltrating lymphocytes from activation-induced cell death and enhances antitumor effector function. *Journal of immunotherapy* 34:236-50.
- Hildebrand JM, Yi Z, Buchtta CM, et al. (2011) Roles of tumor necrosis factor receptor associated factor 3 (TRAF3) and TRAF5 in immune cell functions. *Immunological reviews* 244:55-74.
- Holtan SG, Creedon DJ, Thompson MA, et al. (2011) Expansion of CD16-negative natural killer cells in the peripheral blood of patients with metastatic melanoma. *Clinical & developmental immunology* 2011:316314.
- Hoshida Y (2011) Molecular signatures and prognosis of hepatocellular carcinoma. *Minerva gastroenterologica e dietologica* 57:311-22.
- Huang J, Kerstann KW, Ahmadzadeh M, et al. (2006) Modulation by IL-2 of CD70 and CD27 expression on CD8+ T cells: importance for the therapeutic effectiveness of cell transfer immunotherapy. *Journal of immunology* 176:7726-35.
- Huarte E, Fisher J, Turk MJ, et al. (2009) Ex vivo expansion of tumor specific lymphocytes with IL-15 and IL-21 for adoptive immunotherapy in melanoma. *Cancer letters* 285:80-8.
- Huh SJ, Chen YL, Friedman SL, et al. (2010) KLF6 Gene and early melanoma development in a collagen I-rich extracellular environment. *Journal of the National Cancer Institute* 102:1131-47.
- Ingersoll SB, Langer F, Walker JM, et al. (2009) Deficiencies in the CD40 and CD154 receptor-ligand system reduce experimental lung metastasis. *Clinical & experimental metastasis* 26:829-37.
- Izraely S, Klein A, Sagi-Assif O, et al. (2010) Chemokine-chemokine receptor axes in melanoma brain metastasis. *Immunology letters* 130:107-14.
- Jaeger J, Koczan D, Thiesen HJ, et al. (2007) Gene expression signatures for tumor progression, tumor subtype, and tumor thickness in laser-microdissected melanoma tissues. *Clinical cancer research : an official journal of the American Association for Cancer Research* 13:806-15.
- Jerevall PL, Ma XJ, Li H, et al. (2011) Prognostic utility of HOXB13:IL17BR and molecular grade index in early-stage breast cancer patients from the Stockholm trial. *British journal of cancer* 104:1762-9.
- John T, Black MA, Toro TT, et al. (2008) Predicting clinical outcome through molecular profiling in stage III melanoma. *Clinical cancer research : an official journal of the American Association for Cancer Research* 14:5173-80.
- Jonsson G, Busch C, Knappskog S, et al. (2010) Gene expression profiling-based identification of molecular subtypes in stage IV melanomas with different clinical outcome. *Clinical cancer research : an official journal of the American Association for Cancer Research* 16:3356-67.
- Joshi N, Johnson LL, Wei WQ, et al. (2006) Gene expression differences in normal esophageal mucosa associated with regression and progression of mild and moderate squamous dysplasia in a high-risk Chinese population. *Cancer research* 66:6851-60.
- Jovanovic I, Radosavljevic G, Mitrovic M, et al. (2011) ST2 deletion enhances innate and acquired immunity to murine mammary carcinoma. *European journal of immunology* 41:1902-12.
- Kalb ML, Glaser A, Stry G, et al. (2012) TRAIL(+) human plasmacytoid dendritic cells kill tumor cells in vitro: mechanisms of imiquimod- and IFN-alpha-mediated antitumor reactivity. *Journal of immunology* 188:1583-91.
- Kalbasi A, Fonsatti E, Natali PG, et al. (2010) CD40 expression by human melanocytic lesions and melanoma cell lines and direct CD40 targeting with the therapeutic anti-CD40 antibody CP-870,893. *Journal of immunotherapy* 33:810-6.
- Kannengiesser C, Spatz A, Michiels S, et al. (2008) Gene expression signature associated with BRAF mutations in human primary cutaneous melanomas. *Molecular oncology* 1:425-30.
- Kashani-Sabet M, Rangel J, Torabian S, et al. (2009) A multi-marker assay to distinguish malignant melanomas from benign nevi. *Proceedings of the National Academy of Sciences of the United States of America* 106:6268-72.
- Kato I, Inayama Y, Yamanaka S, et al. (2009) Epithelioid angiomyolipoma of the kidney. *Pathology international* 59:38-43.
- Kerzerho J, Adotevi O, Castelli FA, et al. (2010) The angiogenic growth factor and biomarker midkine is a tumor-shared antigen. *Journal of immunology* 185:418-23.
- Kim JV, Jiang N, Tadokoro CE, et al. (2010) Two-photon laser scanning microscopy imaging of intact spinal cord and cerebral cortex reveals requirement for CXCR6 and neuroinflammation in immune cell infiltration of cortical injury sites. *Journal of immunological methods* 352:89-100.
- Kimpfler S, Sevko A, Ring S, et al. (2009) Skin melanoma development in ret transgenic mice despite the depletion of CD25+Foxp3+ regulatory T cells in lymphoid organs. *Journal of immunology* 183:6330-7.
- Kioi M, Kawakami M, Shimamura T, et al. (2006) Interleukin-13 receptor alpha2 chain: a potential biomarker and molecular target for ovarian cancer therapy. *Cancer* 107:1407-18.
- Kis LL, Salamon D, Persson EK, et al. (2010) IL-21 imposes a type II EBV gene expression on type III and type I B cells by
-

---

the repression of C- and activation of LMP-1-promoter. *Proceedings of the National Academy of Sciences of the United States of America* 107:872-7.

Koh SS, Opel ML, Wei JP, et al. (2009) Molecular classification of melanomas and nevi using gene expression microarray signatures and formalin-fixed and paraffin-embedded tissue. *Modern pathology : an official journal of the United States and Canadian Academy of Pathology, Inc* 22:538-46.

Kojo S, Elly C, Harada Y, et al. (2009) Mechanisms of NKT cell anergy induction involve Cbl-b-promoted monoubiquitination of CARMA1. *Proceedings of the National Academy of Sciences of the United States of America* 106:17847-51.

Konjevic G, Mirjagic Martinovic K, Jurisic V, et al. (2009) Biomarkers of suppressed natural killer (NK) cell function in metastatic melanoma: decreased NKG2D and increased CD158a receptors on CD3-CD16+ NK cells. *Biomarkers : biochemical indicators of exposure, response, and susceptibility to chemicals* 14:258-70.

Kosmidis M, Dziunycz P, Suarez-Farinas M, et al. (2010) Immunosuppression affects CD4+ mRNA expression and induces Th2 dominance in the microenvironment of cutaneous squamous cell carcinoma in organ transplant recipients. *Journal of immunotherapy* 33:538-46.

Kouno J, Nagai H, Nagahata T, et al. (2004) Up-regulation of CC chemokine, CCL3L1, and receptors, CCR3, CCR5 in human glioblastoma that promotes cell growth. *Journal of neuro-oncology* 70:301-7.

Kubler K, tho Pesch C, Gehrke N, et al. (2011) Immunogenic cell death of human ovarian cancer cells induced by cytosolic poly(I:C) leads to myeloid cell maturation and activates NK cells. *European journal of immunology* 41:3028-39.

Kupas V, Weishaupt C, Siepmann D, et al. (2011) RANK is expressed in metastatic melanoma and highly upregulated on melanoma-initiating cells. *The Journal of investigative dermatology* 131:944-55.

Kutikhin AG (2011) Association of polymorphisms in TLR genes and in genes of the Toll-like receptor signaling pathway with cancer risk. *Human immunology* 72:1095-116.

Ladanyi A, Kiss J, Somlai B, et al. (2007) Density of DC-LAMP(+) mature dendritic cells in combination with activated T lymphocytes infiltrating primary cutaneous melanoma is a strong independent prognostic factor. *Cancer immunology, immunotherapy : CII* 56:1459-69.

Lan Q, Wang SS, Menashe I, et al. (2011) Genetic variation in Th1/Th2 pathway genes and risk of non-Hodgkin lymphoma: a pooled analysis of three population-based case-control studies. *British journal of haematology* 153:341-50.

Landi A, Babiuk LA, van Drunen Littel-van den Hurk S (2011) Dendritic cells matured by a prostaglandin E2-containing cocktail can produce high levels of IL-12p70 and are more mature and Th1-biased than dendritic cells treated with TNF-alpha or LPS. *Immunobiology* 216:649-62.

Lee S, Kang J, Cho M, et al. (2009) Profiling of transcripts and proteins modulated by K-ras oncogene in the lung tissues of K-ras transgenic mice by omics approaches. *International journal of oncology* 34:161-72.

Lengagne R, Pommier A, Caron J, et al. (2011) T cells contribute to tumor progression by favoring pro-tumoral properties of intra-tumoral myeloid cells in a mouse model for spontaneous melanoma. *PloS one* 6:e20235.

Leonardi A, Ellinger-Ziegelbauer H, Franzoso G, et al. (2000) Physical and functional interaction of filamin (actin-binding protein-280) and tumor necrosis factor receptor-associated factor 2. *The Journal of biological chemistry* 275:271-8.

Li P, Liu K, Li L, et al. (2011) Reduced CMTM5 expression correlates with carcinogenesis in human epithelial ovarian cancer. *International journal of gynecological cancer : official journal of the International Gynecological Cancer Society* 21:1248-55.

Li Q, Shi L, Gui B, et al. (2011) Binding of the JmjC demethylase JARID1B to LSD1/NuRD suppresses angiogenesis and metastasis in breast cancer cells by repressing chemokine CCL14. *Cancer research* 71:6899-908.

Li X, Ni R, Chen J, et al. (2011) The presence of IGHG1 in human pancreatic carcinomas is associated with immune evasion mechanisms. *Pancreas* 40:753-61.

Li Y, Bleakley M, Yee C (2005) IL-21 influences the frequency, phenotype, and affinity of the antigen-specific CD8 T cell response. *Journal of immunology* 175:2261-9.

Liao YC, Liang WG, Chen FW, et al. (2002) IL-19 induces production of IL-6 and TNF-alpha and results in cell apoptosis through TNF-alpha. *Journal of immunology* 169:4288-97.

Lin R, Genin P, Mamane Y, et al. (2000) Selective DNA binding and association with the CREB binding protein coactivator contribute to differential activation of alpha/beta interferon genes by interferon regulatory factors 3 and 7. *Molecular and cellular biology* 20:6342-53.

Liu H, Wu L, Fu S, et al. (2009) Polylactide-glycolic acid and rapamycin coating intraocular lens prevent posterior capsular opacification in rabbit eyes. *Graefes's archive for clinical and experimental ophthalmology = Albrecht von Graefes Archiv fur klinische und experimentelle Ophthalmologie* 247:801-7.

Ma Y, Visser L, Blokzijl T, et al. (2008) The CD4+CD26- T-cell population in classical Hodgkin's lymphoma displays a distinctive regulatory T-cell profile. *Laboratory investigation; a journal of technical methods and pathology* 88:482-90.

---

- 
- Maat W, van der Slik AR, Verhoeven DH, et al. (2009) Evidence for natural killer cell-mediated protection from metastasis formation in uveal melanoma patients. *Investigative ophthalmology & visual science* 50:2888-95.
- Manousou P, Kolios G, Valatas V, et al. (2010) Increased expression of chemokine receptor CCR3 and its ligands in ulcerative colitis: the role of colonic epithelial cells in in vitro studies. *Clinical and experimental immunology* 162:337-47.
- Marshall KW, Mohr S, Khettabi FE, et al. (2010) A blood-based biomarker panel for stratifying current risk for colorectal cancer. *International journal of cancer Journal international du cancer* 126:1177-86.
- Martin-Orozco N, Li Y, Wang Y, et al. (2010) Melanoma cells express ICOS ligand to promote the activation and expansion of T-regulatory cells. *Cancer research* 70:9581-90.
- Matsumoto Y, Iwakawa M, Furusawa Y, et al. (2008) Gene expression analysis in human malignant melanoma cell lines exposed to carbon beams. *International journal of radiation biology* 84:299-314.
- Mattes J, Hulett M, Xie W, et al. (2003) Immunotherapy of cytotoxic T cell-resistant tumors by T helper 2 cells: an eotaxin and STAT6-dependent process. *The Journal of experimental medicine* 197:387-93.
- Mayne M, Moffatt T, Kong H, et al. (2004) CYFIP2 is highly abundant in CD4+ cells from multiple sclerosis patients and is involved in T cell adhesion. *European journal of immunology* 34:1217-27.
- Mazzieri R, Pucci F, Moi D, et al. (2011) Targeting the ANG2/TIE2 axis inhibits tumor growth and metastasis by impairing angiogenesis and disabling rebounds of proangiogenic myeloid cells. *Cancer cell* 19:512-26.
- McKenzie RC, Oran A, Dinarello CA, et al. (1996) Interleukin-1 receptor antagonist inhibits subcutaneous B16 melanoma growth in vivo. *Anticancer research* 16:437-41.
- McLean MH, Murray GI, Stewart KN, et al. (2011) The inflammatory microenvironment in colorectal neoplasia. *PLoS one* 6:e15366.
- McNulty SE, del Rosario R, Cen D, et al. (2004) Comparative expression of NFkappaB proteins in melanocytes of normal skin vs. benign intradermal naevus and human metastatic melanoma biopsies. *Pigment cell research / sponsored by the European Society for Pigment Cell Research and the International Pigment Cell Society* 17:173-80.
- Mellman I, Coukos G, Dranoff G (2011) Cancer immunotherapy comes of age. *Nature* 480:480-9.
- Melnikova VO, Bar-Eli M (2006) Bioimmunotherapy for melanoma using fully human antibodies targeting MCAM/MUC18 and IL-8. *Pigment cell research / sponsored by the European Society for Pigment Cell Research and the International Pigment Cell Society* 19:395-405.
- Messina JL, Yu H, Riker AI, et al. (2008) Activated stat-3 in melanoma. *Cancer control : journal of the Moffitt Cancer Center* 15:196-201.
- Meugnier E, Coury F, Tebib J, et al. (2011) Gene expression profiling in peripheral blood cells of patients with rheumatoid arthritis in response to anti-TNF-alpha treatments. *Physiological genomics* 43:365-71.
- Mhaweck-Fauceglia P, Allal A, Odunsi K, et al. (2008) Role of the tumour necrosis family ligand APRIL in solid tumour development: Retrospective studies in bladder, ovarian and head and neck carcinomas. *European journal of cancer* 44:2097-100.
- Mischiati C, Natali PG, Sereni A, et al. (2006) cDNA-array profiling of melanomas and paired melanocyte cultures. *Journal of cellular physiology* 207:697-705.
- Miterski B, Jaeckel S, Epplen JT, et al. (1999) The interferon gene cluster: a candidate region for MS predisposition? *Multiple Sclerosis Study Group. Genes and immunity* 1:37-44.
- Morrissey C, True LD, Roudier MP, et al. (2008) Differential expression of angiogenesis associated genes in prostate cancer bone, liver and lymph node metastases. *Clinical & experimental metastasis* 25:377-88.
- Mortarini R, Piris A, Maurichi A, et al. (2003) Lack of terminally differentiated tumor-specific CD8+ T cells at tumor site in spite of antitumor immunity to self-antigens in human metastatic melanoma. *Cancer research* 63:2535-45.
- Mouawad R, Antoine EC, Gil-Delgado M, et al. (2002) Serum caspase-1 levels in metastatic melanoma patients: relationship with tumour burden and non-response to biochemotherapy. *Melanoma research* 12:343-8.
- Movahedi M, Moin M, Gharagozlu M, et al. (2008) Association of HLA class II alleles with childhood asthma and Total IgE levels. *Iranian journal of allergy, asthma, and immunology* 7:215-20.
- Muller DW, Bosserhoff AK (2008) Integrin beta 3 expression is regulated by let-7a miRNA in malignant melanoma. *Oncogene* 27:6698-706.
- Nagai H, Oniki S, Fujiwara S, et al. (2010) Antimelanoma immunotherapy: clinical and preclinical applications of IL-12 family members. *Immunotherapy* 2:697-709.
- Narazaki H, Zhu Y, Luo L, et al. (2010) CD137 agonist antibody prevents cancer recurrence: contribution of CD137 on both hematopoietic and nonhematopoietic cells. *Blood* 115:1941-8.
- Nieters A, Beckmann L, Deeg E, et al. (2006) Gene polymorphisms in Toll-like receptors, interleukin-10, and interleukin-10 receptor alpha and lymphoma risk. *Genes and immunity* 7:615-24.
- Oflazoglu E, Grewal IS, Gerber H (2009) Targeting CD30/CD30L in oncology and autoimmune and inflammatory diseases.
-

- Olkhanud PB, Rochman Y, Bodogai M, et al. (2011) Thymic stromal lymphopoietin is a key mediator of breast cancer progression. *Journal of immunology* 186:5656-62.
- Ortega-Paino E, Fransson J, Ek S, et al. (2008) Functionally associated targets in mantle cell lymphoma as defined by DNA microarrays and RNA interference. *Blood* 111:1617-24.
- Overwijk WW, de Visser KE, Tirion FH, et al. (2006) Immunological and antitumor effects of IL-23 as a cancer vaccine adjuvant. *Journal of immunology* 176:5213-22.
- Oxelius VA (2008) Immunoglobulin constant heavy G subclass chain genes in asthma and allergy. *Immunologic research* 40:179-91.
- Pacheco-Rodriguez G, Kumaki F, Steagall WK, et al. (2009) Chemokine-enhanced chemotaxis of lymphangiioleiomyomatosis cells with mutations in the tumor suppressor TSC2 gene. *Journal of immunology* 182:1270-7.
- Packer L, Pavey S, Parker A, et al. (2006) Osteopontin is a downstream effector of the PI3-kinase pathway in melanomas that is inversely correlated with functional PTEN. *Carcinogenesis* 27:1778-86.
- Padovan E, Terracciano L, Certa U, et al. (2002) Interferon stimulated gene 15 constitutively produced by melanoma cells induces e-cadherin expression on human dendritic cells. *Cancer research* 62:3453-8.
- Paget C, Mallevaey T, Speak AO, et al. (2007) Activation of invariant NKT cells by toll-like receptor 9-stimulated dendritic cells requires type I interferon and charged glycosphingolipids. *Immunity* 27:597-609.
- Paschen A, Arens N, Sucker A, et al. (2006) The coincidence of chromosome 15 aberrations and beta2-microglobulin gene mutations is causative for the total loss of human leukocyte antigen class I expression in melanoma. *Clinical cancer research : an official journal of the American Association for Cancer Research* 12:3297-305.
- Pelekanou A, Kanni T, Savva A, et al. (2010) Long-term efficacy of etanercept in hidradenitis suppurativa: results from an open-label phase II prospective trial. *Experimental dermatology* 19:538-40.
- Perrot-Appinat M, Vacher S, Toullec A, et al. (2011) Similar NF-kappaB gene signatures in TNF-alpha treated human endothelial cells and breast tumor biopsies. *PloS one* 6:e21589.
- Peternel S, Manestar-Blazic T, Brajac I, et al. (2011) Expression of TWEAK in normal human skin, dermatitis and epidermal neoplasms: association with proliferation and differentiation of keratinocytes. *Journal of cutaneous pathology* 38:780-9.
- Piras F, Perra MT, Murtas D, et al. (2010) The stem cell marker nestin predicts poor prognosis in human melanoma. *Oncology reports* 23:17-24.
- Poser I, Bosserhoff AK (2004) Transcription factors involved in development and progression of malignant melanoma. *Histology and histopathology* 19:173-88.
- Priceman SJ, Sung JL, Shaposhnik Z, et al. (2010) Targeting distinct tumor-infiltrating myeloid cells by inhibiting CSF-1 receptor: combating tumor evasion of antiangiogenic therapy. *Blood* 115:1461-71.
- Rahman P, Sun S, Peddle L, et al. (2006) Association between the interleukin-1 family gene cluster and psoriatic arthritis. *Arthritis and rheumatism* 54:2321-5.
- Ramirez-Montagut T, Turk MJ, Wolchok JD, et al. (2003) Immunity to melanoma: unraveling the relation of tumor immunity and autoimmunity. *Oncogene* 22:3180-7.
- Rangaswami H, Kundu GC (2007) Osteopontin stimulates melanoma growth and lung metastasis through NIK/MEKK1-dependent MMP-9 activation pathways. *Oncology reports* 18:909-15.
- Reid-Lombardo KM, Fridley BL, Bamlet WR, et al. (2011) Inflammation-related gene variants as risk factors for pancreatic cancer. *Cancer epidemiology, biomarkers & prevention : a publication of the American Association for Cancer Research, cosponsored by the American Society of Preventive Oncology* 20:1251-4.
- Reiter F, Hartl M, Karagiannidis AI, et al. (2007) WS5, a direct target of oncogenic transcription factor Myc, is related to human melanoma glycoprotein genes and has oncogenic potential. *Oncogene* 26:1769-79.
- Remmelink M, Mijatovic T, Gustin A, et al. (2005) Identification by means of cDNA microarray analyses of gene expression modifications in squamous non-small cell lung cancers as compared to normal bronchial epithelial tissue. *International journal of oncology* 26:247-58.
- Repp AC, Mayhew ES, Apte S, et al. (2000) Human uveal melanoma cells produce macrophage migration-inhibitory factor to prevent lysis by NK cells. *Journal of immunology* 165:710-5.
- Richmond A (2010) Chemokine modulation of the tumor microenvironment. *Pigment cell & melanoma research* 23:312-3.
- Riker AI, Enkemann SA, Fodstad O, et al. (2008) The gene expression profiles of primary and metastatic melanoma yields a transition point of tumor progression and metastasis. *BMC medical genomics* 1:13.
- Riker AI, Enkemann SA, Fodstad O, et al. (2008) The gene expression profiles of primary and metastatic melanoma yields a transition point of tumor progression and metastasis. *BMC medical genomics* 1:13.
- Rivas MA, Beaudoin M, Gardet A, et al. (2011) Deep resequencing of GWAS loci identifies independent rare variants associated with inflammatory bowel disease. *Nature genetics* 43:1066-73.
-



- 
- Roepman P, Schuurman A, Delahaye LJ, et al. (2009) A gene expression profile for detection of sufficient tumour cells in breast tumour tissue: microarray diagnosis eligibility. *BMC medical genomics* 2:52.
- Roesch A, Vogt T, Stolz W, et al. (2003) Discrimination between gene expression patterns in the invasive margin and the tumour core of malignant melanomas. *Melanoma research* 13:503-9.
- Rondepierre F, Bouchon B, Papon J, et al. (2009) Proteomic studies of B16 lines: involvement of annexin A1 in melanoma dissemination. *Biochimica et biophysica acta* 1794:61-9.
- Roy N, Barnett M, Knoch B, et al. (2007) Nutrigenomics applied to an animal model of Inflammatory Bowel Diseases: transcriptomic analysis of the effects of eicosapentaenoic acid- and arachidonic acid-enriched diets. *Mutation research* 622:103-16.
- Saadoun D, Terrier B, Cacoub P (2011) Interleukin-25: key regulator of inflammatory and autoimmune diseases. *Current pharmaceutical design* 17:3781-5.
- Samsen A, Bogoevska V, Klampe B, et al. (2010) DC-SIGN and SRCL bind glycans of carcinoembryonic antigen (CEA) and CEA-related cell adhesion molecule 1 (CEACAM1): recombinant human glycan-binding receptors as analytical tools. *European journal of cell biology* 89:87-94.
- Sanchez-Martin L, Estecha A, Samaniego R, et al. (2011) The chemokine CXCL12 regulates monocyte-macrophage differentiation and RUNX3 expression. *Blood* 117:88-97.
- Schaefer KL, Wai DH, Poremba C, et al. (2002) Characterization of the malignant melanoma of soft-parts cell line GG-62 by expression analysis using DNA microarrays. *Virchows Archiv : an international journal of pathology* 440:476-84.
- Schetter AJ, Nguyen GH, Bowman ED, et al. (2009) Association of inflammation-related and microRNA gene expression with cancer-specific mortality of colon adenocarcinoma. *Clinical cancer research : an official journal of the American Association for Cancer Research* 15:5878-87.
- Segura MF, Hanniford D, Menendez S, et al. (2009) Aberrant miR-182 expression promotes melanoma metastasis by repressing FOXO3 and microphthalmia-associated transcription factor. *Proceedings of the National Academy of Sciences of the United States of America* 106:1814-9.
- Seidl H, Richtig E, Tilz H, et al. (2007) Profiles of chemokine receptors in melanocytic lesions: de novo expression of CXCR6 in melanoma. *Human pathology* 38:768-80.
- Seraglia R, Vogliardi S, Allegri G, et al. (2005) Search for melanoma markers in plasma and serum samples. *European journal of mass spectrometry* 11:353-60.
- Sertznig P, Seifert M, Tilgen W, et al. (2009) Activation of vitamin D receptor (VDR)- and peroxisome proliferator-activated receptor (PPAR)-signaling pathways through 1,25(OH)(2)D(3) in melanoma cell lines and other skin-derived cell lines. *Dermato-endocrinology* 1:232-8.
- Seya T, Oshiumi H, Sasai M, et al. (2005) TICAM-1 and TICAM-2: toll-like receptor adapters that participate in induction of type I interferons. *The international journal of biochemistry & cell biology* 37:524-9.
- Shen M, Cawthon R, Rothman N, et al. (2011) A prospective study of telomere length measured by monochrome multiplex quantitative PCR and risk of lung cancer. *Lung cancer* 73:133-7.
- Sica A, Sacconi A, Bottazzi B, et al. (2000) Defective expression of the monocyte chemotactic protein-1 receptor CCR2 in macrophages associated with human ovarian carcinoma. *Journal of immunology* 164:733-8.
- Simonetti O, Goteri G, Lucarini G, et al. (2007) In melanoma changes of immature and mature dendritic cell expression correlate with tumor thickness: an immunohistochemical study. *International journal of immunopathology and pharmacology* 20:325-33.
- Slattery ML, Lundgreen A, Bondurant KL, et al. (2011) Interferon-signaling pathway: associations with colon and rectal cancer risk and subsequent survival. *Carcinogenesis* 32:1660-7.
- Slebioda TJ, Rowley TF, Ferdinand JR, et al. (2011) Triggering of TNFRSF25 promotes CD8(+) T-cell responses and anti-tumor immunity. *European journal of immunology* 41:2606-11.
- Smith AP, Hoek K, Becker D (2005) Whole-genome expression profiling of the melanoma progression pathway reveals marked molecular differences between nevi/melanoma in situ and advanced-stage melanomas. *Cancer biology & therapy* 4:1018-29.
- Starska K, Forma E, Lewy-Trenda I, et al. (2009) The expression of SOCS1 and TLR4-NFkappaB pathway molecules in neoplastic cells as potential biomarker for the aggressive tumor phenotype in laryngeal carcinoma. *Folia histochemica et cytobiologica / Polish Academy of Sciences, Polish Histochemical and Cytochemical Society* 47:401-10.
- Stebbing J, Srivastava P (2007) Heat shock protein-receptor-based pharmacogenomics: the search for new cancer antigens. *Pharmacogenomics* 8:117-20.
- Stone GW, Barzee S, Snarsky V, et al. (2009) Nanoparticle-delivered multimeric soluble CD40L DNA combined with Toll-Like Receptor agonists as a treatment for melanoma. *PLoS one* 4:e7334.
- Straume O, Akslen LA (2005) Strong expression of ID1 protein is associated with decreased survival, increased expression of ephrin-A1/EPHA2, and reduced thrombospondin-1 in malignant melanoma. *British journal of cancer* 93:933-8.
-

---

Struyf S, Proost P, Vandercappellen J, et al. (2009) Synergistic up-regulation of MCP-2/CCL8 activity is counteracted by chemokine cleavage, limiting its inflammatory and anti-tumoral effects. *European journal of immunology* 39:843-57.

Taghizadeh R, Noh M, Huh YH, et al. (2010) CXCR6, a newly defined biomarker of tissue-specific stem cell asymmetric self-renewal, identifies more aggressive human melanoma cancer stem cells. *PloS one* 5:e15183.

Tao J, Li Y, Liu YQ, et al. (2008) Expression of transporters associated with antigen processing and human leucocyte antigen class I in malignant melanoma and its association with prognostic factors. *The British journal of dermatology* 158:88-94.

Tell R, Wang QT, Blunier A, et al. (2011) Identification of ChIP-seq mapped targets of HP1beta due to bombesin/GRP receptor activation. *Clinical epigenetics* 2:331-8.

Teschendorff AE, Menon U, Gentry-Maharaj A, et al. (2009) An epigenetic signature in peripheral blood predicts active ovarian cancer. *PloS one* 4:e8274.

Timar J, Gyorffy B, Raso E (2010) Gene signature of the metastatic potential of cutaneous melanoma: too much for too little? *Clinical & experimental metastasis* 27:371-87.

Tjin EP, Konijnenberg D, Krebbers G, et al. (2011) T-cell immune function in tumor, skin, and peripheral blood of advanced stage melanoma patients: implications for immunotherapy. *Clinical cancer research : an official journal of the American Association for Cancer Research* 17:5736-47.

Toh B, Wang X, Keeble J, et al. (2011) Mesenchymal transition and dissemination of cancer cells is driven by myeloid-derived suppressor cells infiltrating the primary tumor. *PLoS biology* 9:e1001162.

Toritsu-Itakura H, Lee JH, Scheri RP, et al. (2007) Molecular characterization of inflammatory genes in sentinel and nonsentinel nodes in melanoma. *Clinical cancer research : an official journal of the American Association for Cancer Research* 13:3125-32.

Tsuno T, Mejido J, Zhao T, et al. (2009) IRF9 is a key factor for eliciting the antiproliferative activity of IFN-alpha. *Journal of immunotherapy* 32:803-16.

Twoorkoski K, Singhal G, Szpakowski S, et al. (2011) Phosphoproteomic screen identifies potential therapeutic targets in melanoma. *Molecular cancer research : MCR* 9:801-12.

Ueda Y, Su Y, Richmond A (2007) CCAAT displacement protein regulates nuclear factor-kappa beta-mediated chemokine transcription in melanoma cells. *Melanoma research* 17:91-103.

Ugurel S, Hildenbrand R, Zimpfer A, et al. (2005) Lack of clinical efficacy of imatinib in metastatic melanoma. *British journal of cancer* 92:1398-405.

van de Ven R, van den Hout MF, Lindenberg JJ, et al. (2011) Characterization of four conventional dendritic cell subsets in human skin-draining lymph nodes in relation to T-cell activation. *Blood* 118:2502-10.

van der Velden PA, Zuidervaart W, Hurks MH, et al. (2003) Expression profiling reveals that methylation of TIMP3 is involved in uveal melanoma development. *International journal of cancer Journal international du cancer* 106:472-9.

van der Voort R, Verweij V, de Witte TM, et al. (2010) An alternatively spliced CXCL16 isoform expressed by dendritic cells is a secreted chemoattractant for CXCR6+ cells. *Journal of leukocyte biology* 87:1029-39.

Varma RR, Hector SM, Clark K, et al. (2005) Gene expression profiling of a clonal isolate of oxaliplatin-resistant ovarian carcinoma cell line A2780/C10. *Oncology reports* 14:925-32.

Vazquez N, Schmeisser H, Dolan MA, et al. (2011) Structural variants of IFNalpha preferentially promote antiviral functions. *Blood* 118:2567-77.

Velazquez EF, Yancovitz M, Pavlick A, et al. (2007) Clinical relevance of neutral endopeptidase (NEP/CD10) in melanoma. *Journal of translational medicine* 5:2.

Vermi W, Bonocchi R, Facchetti F, et al. (2003) Recruitment of immature plasmacytoid dendritic cells (plasmacytoid monocytes) and myeloid dendritic cells in primary cutaneous melanomas. *The Journal of pathology* 200:255-68.

Vihinen PP, Hilli J, Vuoristo MS, et al. (2007) Serum VEGF-C is associated with metastatic site in patients with malignant melanoma. *Acta oncologica* 46:678-84.

Wang M, Windgassen D, Papoutsakis ET (2008) Comparative analysis of transcriptional profiling of CD3+, CD4+ and CD8+ T cells identifies novel immune response players in T-cell activation. *BMC genomics* 9:225.

Williams P, Bouchentouf M, Rafei M, et al. (2010) A dendritic cell population generated by a fusion of GM-CSF and IL-21 induces tumor-antigen-specific immunity. *Journal of immunology* 185:7358-66.

Wolk K, Witte K, Sabat R (2010) Interleukin-28 and interleukin-29: novel regulators of skin biology. *Journal of interferon & cytokine research : the official journal of the International Society for Interferon and Cytokine Research* 30:617-28.

Xie Y, Sheng W, Xiang J, et al. (2010) Interleukin-17F suppresses hepatocarcinoma cell growth via inhibition of tumor angiogenesis. *Cancer investigation* 28:598-607.

Yegutkin GG, Marttila-Ichihara F, Karikoski M, et al. (2011) Altered purinergic signaling in CD73-deficient mice inhibits tumor progression. *European journal of immunology* 41:1231-41.

Yeramian A, Santacana M, Sorolla A, et al. (2011) Nuclear factor-kappaB2/p100 promotes endometrial carcinoma cell survival under hypoxia in a HIF-1alpha independent manner. *Laboratory investigation; a journal of technical methods and*

---

---

pathology 91:859-71.

Yi H, Guo C, Yu X, et al. (2011) Targeting the immunoregulator SRA/CD204 potentiates specific dendritic cell vaccine-induced T-cell response and antitumor immunity. *Cancer research* 71:6611-20.

Yoshimoto T, Morishima N, Mizoguchi I, et al. (2008) Antiproliferative activity of IL-27 on melanoma. *Journal of immunology* 180:6527-35.

Yuan Q, Huang L, Wang X, et al. (2012) Construction of human nonimmune library and selection of scFvs against IL-33. *Applied biochemistry and biotechnology* 167:498-509.

Zarei S, Schwenter F, Luy P, et al. (2009) Role of GM-CSF signaling in cell-based tumor immunization. *Blood* 113:6658-68.

Zhang WJ, Li BH, Yang XZ, et al. (2008) IL-4-induced Stat6 activities affect apoptosis and gene expression in breast cancer cells. *Cytokine* 42:39-47.

Zhao XW, van Beek EM, Schornagel K, et al. (2011) CD47-signal regulatory protein-alpha (SIRPalpha) interactions form a barrier for antibody-mediated tumor cell destruction. *Proceedings of the National Academy of Sciences of the United States of America* 108:18342-7.

Zhou Y, Toh ML, Zrioual S, et al. (2007) IL-17A versus IL-17F induced intracellular signal transduction pathways and modulation by IL-17RA and IL-17RC RNA interference in AGS gastric adenocarcinoma cells. *Cytokine* 38:157-64.

Zhuang L, Lee CS, Scolyer RA, et al. (2006) Progression in melanoma is associated with decreased expression of death receptors for tumor necrosis factor-related apoptosis-inducing ligand. *Human pathology* 37:1286-94.

---

**Table S3.** The Proposed functions\* of the 25 genes with the highest out-degree in the 53-gene panel Bayesian network.

| Gene   | Out-Degree | Log2 Fold Change | T-Statistic | p value | FDR    | Proposed Function                                                                                                                                                                                          |
|--------|------------|------------------|-------------|---------|--------|------------------------------------------------------------------------------------------------------------------------------------------------------------------------------------------------------------|
| CCR5   | 12         | -0.5754          | 1.9699      | 0.0593  | 0.1598 | Expressed on Th1 CD4 T cells (Loetscher <i>et al</i> , 1998) and regulates functions of macrophages, NK cells and T cells                                                                                  |
| CD8A   | 12         | -0.9392          | 2.5076      | 0.0182  | 0.1021 | Co-receptor with the T-cell receptor on cytotoxic T lymphocytes to recognize antigens in the context of class I MHC molecules.                                                                             |
| CD3D   | 11         | NT*              | NT          | NT      | NT     | Part of the T-cell receptor complex, involved in T-cell development and signal transduction.                                                                                                               |
| CD8B   | 11         | NT               | NT          | NT      | NT     | Similar function to CD8A with which it forms a heterodimer                                                                                                                                                 |
| IKZF1  | 11         | -0.5553          | 2.3094      | 0.0265  | 0.1044 | Transcription factor associated with chromatin remodeling, functions as a regulator of lymphocyte differentiation.                                                                                         |
| BTK    | 10         | -0.4292          | 2.3713      | 0.0234  | 0.1044 | Expressed by B cells and crucial for their development                                                                                                                                                     |
| LCK    | 10         | -0.9079          | 2.9279      | 0.0063  | 0.1021 | Key signaling molecule in the selection and maturation of developing T-cells.                                                                                                                              |
| CD3E   | 9          | -0.6031          | 2.192       | 0.0357  | 0.1205 | Part of the T cell receptor complex, couples antigen recognition to signal-transduction pathways.                                                                                                          |
| CD53   | 9          | -0.5731          | 2.425       | 0.0222  | 0.1044 | Contributes to the transduction of CD2-generated signals in T cells and natural killer cells.                                                                                                              |
| COPS2  | 9          | NT               | NT          | NT      | NT     | Essential component of the COP9 signalosome complex (CSN), a complex involved in multiple cellular processes and implicated in interferon related signaling.(Cohen <i>et al</i> , 2000)                    |
| CXCL9  | 9          | -0.7667          | 1.9471      | 0.0592  | 0.1589 | Chemokine implicated in T cell trafficking.                                                                                                                                                                |
| EGFR   | 9          | NT               | NT          | NT      | NT     | Receptor for members of the epidermal growth factor family.                                                                                                                                                |
| EPS8L1 | 9          | NT               | NT          | NT      | NT     | A substrate for the epidermal growth factor receptor.                                                                                                                                                      |
| FGFR3  | 9          | NT               | NT          | NT      | NT     | The extracellular portion of the protein interacts with fibroblast growth factors, setting in motion a cascade of downstream signals, ultimately influencing mitogenesis and differentiation.              |
| GPS1   | 9          | NT               | NT          | NT      | NT     | Suppresses G-protein and mitogen-activated signal transduction in mammalian cells.                                                                                                                         |
| MS4A1  | 9          | NT               | NT          | NT      | NT     | B-lymphocyte surface molecule, plays a role in the development and differentiation of B-cells into plasma cells.                                                                                           |
| PPP3CB | 9          | NT               | NT          | NT      | NT     | Acalcium-dependent, calmodulin-stimulated protein phosphatase. This subunit may have a role in the calmodulin activation of calcineurin.                                                                   |
| CD1A   | 8          | -0.1511          | 0.5498      | 0.5857  | 0.6981 | structurally related to the major histocompatibility complex (MHC) proteins and form heterodimers with beta-2-microglobulin.                                                                               |
| CD2    | 8          | -0.9678          | 3.4058      | 0.0020  | 0.0852 | A surface antigen of the human T-lymphocyte lineage that is expressed on all peripheral blood T cells.                                                                                                     |
| CD58   | 8          | -0.0554          | 0.3335      | 0.7406  | 0.8211 | A ligand of the T lymphocyte CD2 protein of the immunoglobulin superfamily, functions in adhesion and activation of T lymphocytes.                                                                         |
| CD81   | 8          | NT               | NT          | NT      | NT     | A cell-surface protein that co-ordinates special localization of transmembrane proteins and can modulate leucocyte activation and signaling. Also proposed tumor suppressor. (Mattila <i>et al</i> , 2013) |
| IL2RB  | 8          | NT               | NT          | NT      | NT     | Subunit of the interleukin 2 receptor, involved in receptor-mediated endocytosis and transduction of mitogenic signals from interleukin 2.                                                                 |

|          |   |    |    |    |    |                                                                                                                                                                                                                        |
|----------|---|----|----|----|----|------------------------------------------------------------------------------------------------------------------------------------------------------------------------------------------------------------------------|
| NCOR2    | 8 | NT | NT | NT | NT | Part of a multisubunit complex which includes histone deacetylases to modify chromatin structure that prevents basal transcriptional activity of target genes. Aberrant expression is associated with certain cancers. |
| PRKD2    | 8 | NT | NT | NT | NT | Belongs to the protein kinase D (PKD) family of serine/threonine protein kinases. Binds to diacylglycerol (DAG) in the trans-Golgi network (TGN) and may regulate basolateral membrane protein exit from TGN.          |
| TNFRSF1B | 8 | NT | NT | NT | NT | Signaling through this receptor modulates apoptosis as well as tumor necrosis factor (TNF) signaling.                                                                                                                  |

\*Based on Pubgene and references as indicated by footnotes

Loetscher P, Ugucioni M, Bordoli L, Baggiolini M, Moser B, Chizzolini C, *et al.* (1998) CCR5 is characteristic of Th1 lymphocytes. *Nature* 391:344-5.

Cohen H, Azriel A, Cohen T, *et al.* (2000) Interaction between interferon consensus sequence-binding protein and COP9/signalosome subunit CSN2 (Trip15). A possible link between interferon regulatory factor signaling and the COP9/signalosome. *Journal of Biological Chemistry* 275:39081-9.

Mattila PK, Feest C, Depoil D, *et al.* (2013) The actin and tetraspanin networks organize receptor nanoclusters to regulate B cell receptor-mediated signaling. *Immunity* 38:461-74.

**Table S4.** Top 10 enriched KEGG and GO terms (using DAVID) in the 53-gene, 446-gene, and 758-gene modules relative to the whole genome.

| Module   | Category      | Term                                                              | p value     | Fold Enrichment | Bonferroni  | Benjamini   | FDR         |
|----------|---------------|-------------------------------------------------------------------|-------------|-----------------|-------------|-------------|-------------|
| 53-gene  | GOTERM_BP_FAT | GO:0006955~immune response                                        | 2.34E-57    | 5.987716412     | 5.76E-54    | 5.76E-54    | 4.12E-54    |
|          | GOTERM_BP_FAT | GO:0002684~positive regulation of immune system process           | 1.48E-42    | 9.524596866     | 3.65E-39    | 1.82E-39    | 2.61E-39    |
|          | GOTERM_BP_FAT | GO:0048584~positive regulation of response to stimulus            | 9.87E-33    | 8.210994045     | 2.43E-29    | 8.11E-30    | 1.74E-29    |
|          | GOTERM_BP_FAT | GO:0045321~leukocyte activation                                   | 4.12E-31    | 7.856332365     | 1.02E-27    | 2.54E-28    | 7.26E-28    |
|          | GOTERM_BP_FAT | GO:0050778~positive regulation of immune response                 | 1.39E-30    | 10.59041938     | 3.43E-27    | 6.86E-28    | 2.45E-27    |
|          | GOTERM_BP_FAT | GO:0001775~cell activation                                        | 2.75E-30    | 7.006686129     | 6.79E-27    | 1.13E-27    | 4.85E-27    |
|          | GOTERM_BP_FAT | GO:0046649~lymphocyte activation                                  | 6.60E-29    | 8.451555073     | 1.63E-25    | 2.32E-26    | 1.16E-25    |
|          | KEGG_PA_THWAY | hsa04650:Natural killer cell mediated cytotoxicity                | 1.68E-28    | 7.031371532     | 1.78E-26    | 1.78E-26    | 1.88E-25    |
|          | GOTERM_BP_FAT | GO:0042110~T cell activation                                      | 2.44E-28    | 11.02668383     | 6.01E-25    | 7.51E-26    | 4.29E-25    |
|          | KEGG_PA_THWAY | hsa04660:T cell receptor signaling pathway                        | 1.91E-27    | 7.757024266     | 2.02E-25    | 1.01E-25    | 2.14E-24    |
| 446-gene | GOTERM_BP_FAT | GO:0006955~immune response                                        | 2.92E-104   | 3.130862049     | 1.44E-100   | 1.44E-100   | 5.55E-101   |
|          | GOTERM_BP_FAT | GO:0010941~regulation of cell death                               | 3.14E-85    | 2.726186103     | 1.55E-81    | 7.73E-82    | 5.96E-82    |
|          | GOTERM_BP_FAT | GO:0043067~regulation of programmed cell death                    | 4.09E-85    | 2.728678557     | 2.01E-81    | 6.71E-82    | 7.77E-82    |
|          | KEGG_PA_THWAY | hsa04060:Cytokine-cytokine receptor interaction                   | 1.05E-84    | 3.192464986     | 1.72E-82    | 1.72E-82    | 1.28E-81    |
|          | GOTERM_BP_FAT | GO:0042981~regulation of apoptosis                                | 3.02E-83    | 2.717554176     | 1.49E-79    | 3.72E-80    | 5.74E-80    |
|          | GOTERM_BP_FAT | GO:0006952~defense response                                       | 1.35E-74    | 2.892202076     | 6.63E-71    | 1.33E-71    | 2.56E-71    |
|          | GOTERM_BP_FAT | GO:0010604~positive regulation of macromolecule metabolic process | 1.87E-73    | 2.542309068     | 9.19E-70    | 1.53E-70    | 3.55E-70    |
|          | GOTERM_BP_FAT | GO:0009611~response to wounding                                   | 1.49E-69    | 2.984442117     | 7.36E-66    | 1.05E-66    | 2.84E-66    |
|          | GOTERM_BP_FAT | GO:0007243~protein kinase cascade                                 | 4.28E-67    | 3.393394486     | 2.11E-63    | 2.63E-64    | 8.13E-64    |
|          | GOTERM_BP_FAT | GO:0002684~positive regulation of immune system process           | 1.50324E-66 | 4.06002401      | 7.40198E-63 | 8.22442E-64 | 2.85615E-63 |
| 758-gene | GOTERM_BP_FAT | GO:0006955~immune response                                        | 2.92E-104   | 3.130862049     | 1.44E-100   | 1.44E-100   | 5.55E-101   |
|          | GOTERM_BP_FAT | GO:0010941~regulation of cell death                               | 3.14E-85    | 2.726186103     | 1.55E-81    | 7.73E-82    | 5.96E-82    |
|          | GOTERM_BP_FAT | GO:0043067~regulation of programmed cell death                    | 4.09E-85    | 2.728678557     | 2.01E-81    | 6.71E-82    | 7.77E-82    |
|          | KEGG_PA_THWAY | hsa04060:Cytokine-cytokine receptor interaction                   | 1.05E-84    | 3.192464986     | 1.72E-82    | 1.72E-82    | 1.28E-81    |
|          | GOTERM_BP_FAT | GO:0042981~regulation of apoptosis                                | 3.02E-83    | 2.717554176     | 1.49E-79    | 3.72E-80    | 5.74E-80    |
|          | GOTERM_BP_FAT | GO:0006952~defense response                                       | 1.35E-74    | 2.892202076     | 6.63E-71    | 1.33E-71    | 2.56E-71    |
|          | GOTERM_BP_FAT | GO:0010604~positive regulation of macromolecule metabolic process | 1.87E-73    | 2.542309068     | 9.19E-70    | 1.53E-70    | 3.55E-70    |
|          | GOTERM_BP_FAT | GO:0009611~response to wounding                                   | 1.49E-69    | 2.984442117     | 7.36E-66    | 1.05E-66    | 2.84E-66    |
|          | GOTERM_BP_FAT | GO:0007243~protein kinase cascade                                 | 4.28E-67    | 3.393394486     | 2.11E-63    | 2.63E-64    | 8.13E-64    |
|          | GOTERM_BP_FAT | GO:0002684~positive regulation of immune system process           | 1.50E-66    | 4.06002401      | 7.40E-63    | 8.22E-64    | 2.86E-63    |

**Table S5:** Comparison of the clinical-pathologic features of training set and test set.

| <b>Parameter</b>    | <b>p value*</b> |
|---------------------|-----------------|
| Gender              | 0.6043          |
| Age                 | 0.5305          |
| Location            | 0.9176          |
| Depth               | 0.8780          |
| Ulceration          | 0.9150          |
| TILs                | 0.0383          |
| Mitosis             | 0.0020          |
| Stage               | 0.9642          |
| Disease progression | 0.9698          |
| Died from Melanoma  | 0.8736          |

\*p values are shown without correction for multiple comparisons. Student T test was used for continuous variables and Fisher Exact Test for categorical variables.

**Table S6.** Gene expression data from primary melanoma tumors GEO (GSE15605).

| <b>GEO sample</b> | <b>Phenotype</b>        |
|-------------------|-------------------------|
| GSM390224         | Primary_melanoma MEL101 |
| GSM390225         | Primary_melanoma MEL128 |
| GSM390226         | Primary_melanoma MEL131 |
| GSM390227         | Primary_melanoma MEL135 |
| GSM390228         | Primary_melanoma MEL142 |
| GSM390229         | Primary_melanoma MEL145 |
| GSM390230         | Primary_melanoma MEL157 |
| GSM390231         | Primary_melanoma MEL173 |
| GSM390232         | Primary_melanoma MEL176 |
| GSM390233         | Primary_melanoma MEL185 |
| GSM390234         | Primary_melanoma MEL190 |
| GSM390235         | Primary_melanoma MEL197 |
| GSM390236         | Primary_melanoma MEL209 |
| GSM390237         | Primary_melanoma MEL213 |
| GSM390238         | Primary_melanoma MEL233 |
| GSM390239         | Primary_melanoma MEL236 |
| GSM390240         | Primary_melanoma MEL243 |
| GSM390241         | Primary_melanoma MEL244 |
| GSM390242         | Primary_melanoma MEL250 |
| GSM390243         | Primary_melanoma MEL257 |
| GSM390244         | Primary_melanoma MEL258 |
| GSM390245         | Primary_melanoma MEL272 |
| GSM390246         | Primary_melanoma MEL275 |
| GSM390247         | Primary_melanoma MEL276 |
| GSM390248         | Primary_melanoma MEL280 |
| GSM390249         | Primary_melanoma MEL282 |
| GSM390250         | Primary_melanoma MEL283 |
| GSM390251         | Primary_melanoma MEL287 |
| GSM390252         | Primary_melanoma MEL290 |
| GSM390253         | Primary_melanoma MEL294 |
| GSM390254         | Primary_melanoma MEL298 |
| GSM390255         | Primary_melanoma MEL307 |
| GSM390256         | Primary_melanoma MEL310 |
| GSM390257         | Primary_melanoma MEL326 |
| GSM390258         | Primary_melanoma MEL339 |
| GSM390259         | Primary_melanoma MEL340 |
| GSM390260         | Primary_melanoma MEL356 |
| GSM390261         | Primary_melanoma MEL362 |



|           |                         |
|-----------|-------------------------|
| GSM390262 | Primary_melanoma MEL364 |
| GSM390263 | Primary_melanoma MEL375 |
| GSM390264 | Primary_melanoma MEL380 |
| GSM390265 | Primary_melanoma MEL385 |
| GSM390266 | Primary_melanoma MEL395 |
| GSM390267 | Primary_melanoma MEL420 |
| GSM390268 | Primary_melanoma MEL429 |
| GSM390269 | Primary_melanoma MEL430 |

---

**Table S7.** Clinical characteristics of patients with primary melanoma in extracted vs. non-extracted samples

| Characteristics                     | Training Set        |                        |         | Test Set            |                        |         |
|-------------------------------------|---------------------|------------------------|---------|---------------------|------------------------|---------|
|                                     | Extracted<br>(N=40) | Non-extracted<br>(N=7) | p value | Extracted<br>(N=48) | Non-extracted<br>(N=9) | p value |
| <b>Clinical characteristics</b>     |                     |                        |         |                     |                        |         |
| <b>Sex</b>                          |                     |                        |         |                     |                        |         |
| Male -- no.(%)                      | 28 (70)             | 6 (86)                 | 0.655   | 26 (54)             | 5 (56)                 | 1.000   |
| Female -- no.(%)                    | 12 (30)             | 1 (14)                 |         | 22 (46)             | 4 (44)                 |         |
| <b>Age</b>                          |                     |                        |         |                     |                        |         |
| Median (range) --no.                | 67<br>(29-87)       | 73 (54-77)             | 0.423   | 65 (27-90)          | 55 (46-88)             | 0.415   |
| <b>Location of Tumor</b>            |                     |                        |         |                     |                        |         |
| Trunk -- no.(%)                     | 24 (60)             | 5 (71)                 | 0.692   | 25 (52)             | 7 (78)                 | 0.273   |
| Extremity -- no.(%)                 | 16 (40)             | 2 (29)                 |         | 23 (48)             | 2 (22)                 |         |
| <b>Stage</b>                        |                     |                        |         |                     |                        |         |
| II -- no. (%)                       | 18 (45)             | 3 (43)                 | 0.731   | 25 (52)             | 4 (44)                 | 0.730   |
| III -- no. (%)                      | 22 (55)             | 4 (57)                 |         | 23 (48)             | 5 (56)                 |         |
| <b>Pathological characteristics</b> |                     |                        |         |                     |                        |         |
| Depth (mm) – median (range)         | 2.65<br>(1.2-13)    | 2.18<br>(1.30-2.95)    | 0.166   | 3.47<br>(1-30)      | 3.90 (1-8)             | 0.655   |
| <b>Ulceration</b>                   |                     |                        |         |                     |                        |         |
| Absent -- no.(%)                    | 21 (52)             | 4 (57)                 | 0.701   | 20 (42)             | 6 (67)                 | 0.275   |
| Present -- no.(%)                   | 19 (48)             | 3 (43)                 |         | 28 (58)             | 3 (33)                 |         |
| Disease progression                 | 21 (52)             | 2 (29)                 | 0.416   | 22 (46)             | 2 (22)                 | 0.278   |
